# Supplementary material for: One-step chemical vapor deposition synthesis of Si NWs@C core/shell anodes without additional catalysts by the oxide-assisted growth mechanism for lithium-ion batteries
Source: Royal Society of Chemistry journal article supplement (doi:10.1039/d4dt00131a), 2024-01-01
Supplement: d4dt00131a1.pdf [file d4dt00131a1.pdf]

## Supplementary Information

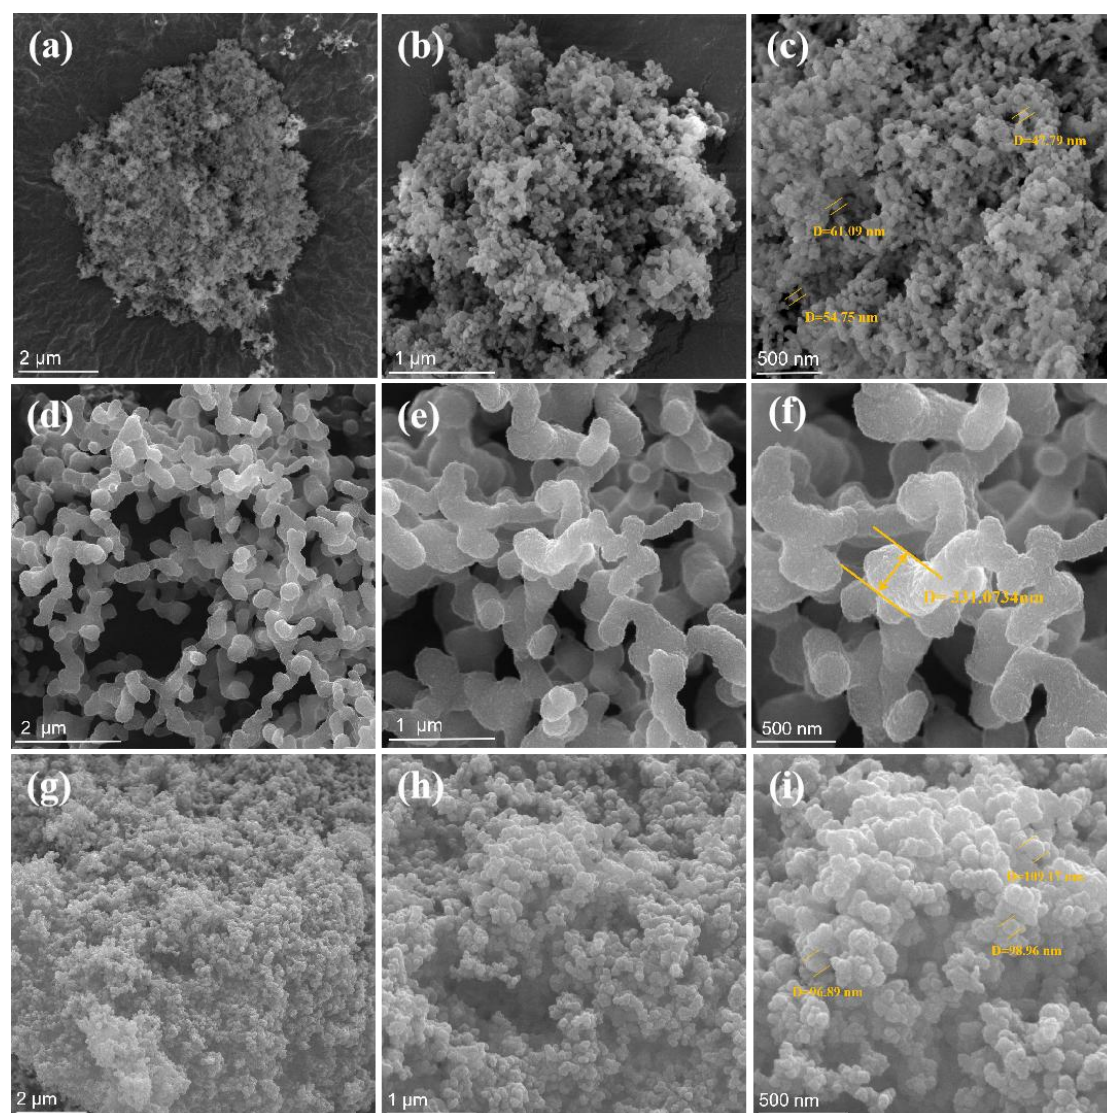

**Fig. S1** (a)~(c) SEM images of pristine Si nanoparticles. (d)~(f) SEM images of SC-3. (g)~(i) SEM images of carbon-coated silicon particles.

| Materials                 | Content of Si              | Cycling performance                                             | Rate capacity          | ICE (%) | Electrode thickness | Refs |
|---------------------------|----------------------------|-----------------------------------------------------------------|------------------------|---------|---------------------|------|
|                           |                            | (mAh g <sup>-1</sup> )                                          | (mAh g <sup>-1</sup> ) |         | swelling            |      |
| Si NWs                    | 11.5%                      | 1587 after 140 cycles at 0.1 C<br>(1C=3579 mA g <sup>-1</sup> ) | 760 at 1 C             | 81      | -                   | 18   |
| Gt-SiNW                   | 32%                        | 664 after 200 cycles at 2 C                                     | 327 at 5 C             | 72      | 20%                 | 26   |
| SiO/Si NWs                | 80 wt% of active materials | ~960 after 100 cycles at 0.1 C                                  | 1084 at 3 C            | 54.3    | ~40%                | 11   |
| nf-Si@C                   | 60 wt% of active materials | 1141 over 100 cycles at 0.2 C<br>(1C=1350 mA g <sup>-1</sup> )  | 414 at 5 C             | 58      | -                   | 40   |
| SiO <sub>x</sub> /SNWs @C | (C = 13.6 wt%)             | ~760 after 200 cycles at 0.2 C<br>(1C=1500 mA g <sup>-1</sup> ) | 617.5 at 1 C           | 74.6    | -                   | 24   |
| Si NWs@C                  | 32.34%                     | ~600 after 200 cycles at 5 C<br>(1C=100 mA g <sup>-1</sup> )    | 570.5 at 10 C          | 76.36   | 30.7%               |      |

**Fig. S2** The electrochemical performance of the Si NWs@C and other reported Si-based materials as anodes for LIBs

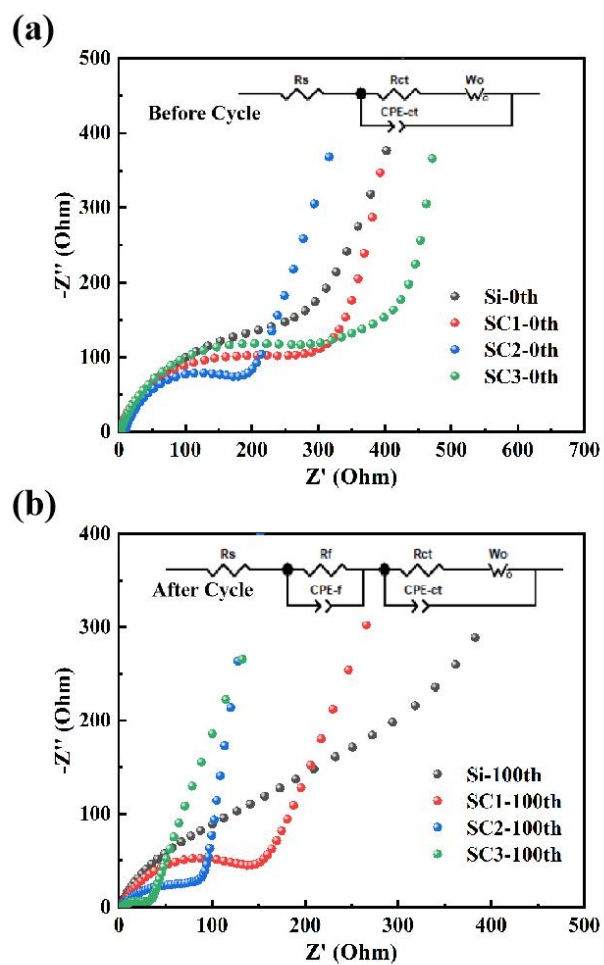

**Fig. S3** (a) Nyquist plots of Si NPs, SC-1, SC-2 and SC-3 electrodes before cycling. (b) Nyquist plots of Si NPs, SC-1, SC-2 and SC-3 electrodes after cycling.
